# Supplementary material for: Synergetic effect of photocatalysis and peroxymonosulfate activation by MIL-53Fe@TiO2 on efficient degradation of tetracycline hydrochloride under visible light irradiation
Source: Royal Society of Chemistry journal article supplement (doi:10.1039/d2ce00372d), 2022-01-01
Supplement: d2ce00372d1.pdf [file d2ce00372d1.pdf]

# Supporting Information

## **Synergetic effect of photocatalysis and peroxymonosulfate activated by MIL-53Fe@TiO<sub>2</sub> for efficient degradation of tetracycline hydrochloride under visible light irradiation**

Di Li,<sup>\*a</sup> Hongmiao Li,<sup>a</sup> MingYang Long,<sup>a</sup> Xiaojuan Bai,<sup>c</sup> Qianqian Zhao,<sup>a</sup> Qi Wen<sup>a</sup> and Fang  
Song<sup>b</sup>

<sup>a</sup> School of Chemistry and Chemical Engineering, Xi'an University of Architecture and  
Technology, Xi'an, 710055, China

<sup>b</sup> Instrument Analysis Center, Xi'an University of Architecture and Technology,  
Xi'an, 710055, China

<sup>c</sup> School of Environment and Energy Engineering, Beijing University of Civil Engineering and  
Architecture, Beijing, 102616, China

**Table 1** A summary of photocatalysts for photocatalytic degradation of tetracycline hydrochloride.

| Sample                                         | Catalyst(mg) | TCH(mg • L <sup>-1</sup> ) | Efficiency(%) | K value(min <sup>-1</sup> ) | Light source          | Ref.      |
|------------------------------------------------|--------------|----------------------------|---------------|-----------------------------|-----------------------|-----------|
| TiO <sub>2</sub> @Ag-CuO                       | 30           | 30(30mL)                   | 82.86(180min) | 0.00984                     | 500 W(Xe lamp)        | 11        |
| Cu-TiO <sub>2</sub>                            | 20           | 20(50mL)                   | 90(240min)    | 0.00978                     | 1000 W(Xe lamp)       | 12        |
| BiPO <sub>4</sub> /NH <sub>2</sub> -MIL-53(Fe) | 80           | 20(80mL)                   | 80(120min)    | 0.0150                      | 500 W<br>halogen lamp | 13        |
| MIL-53Fe@TiO <sub>2</sub>                      | 50           | 40(100mL)                  | 71.9(60min)   | 0.12245                     | 300W<br>halogen lamp  | This work |

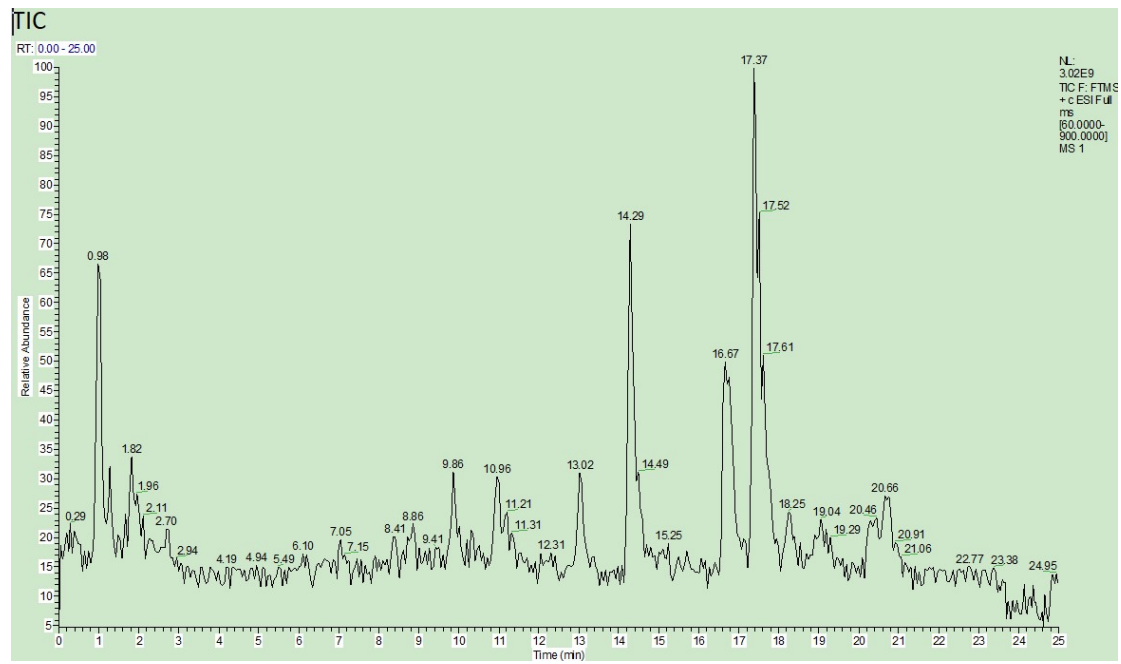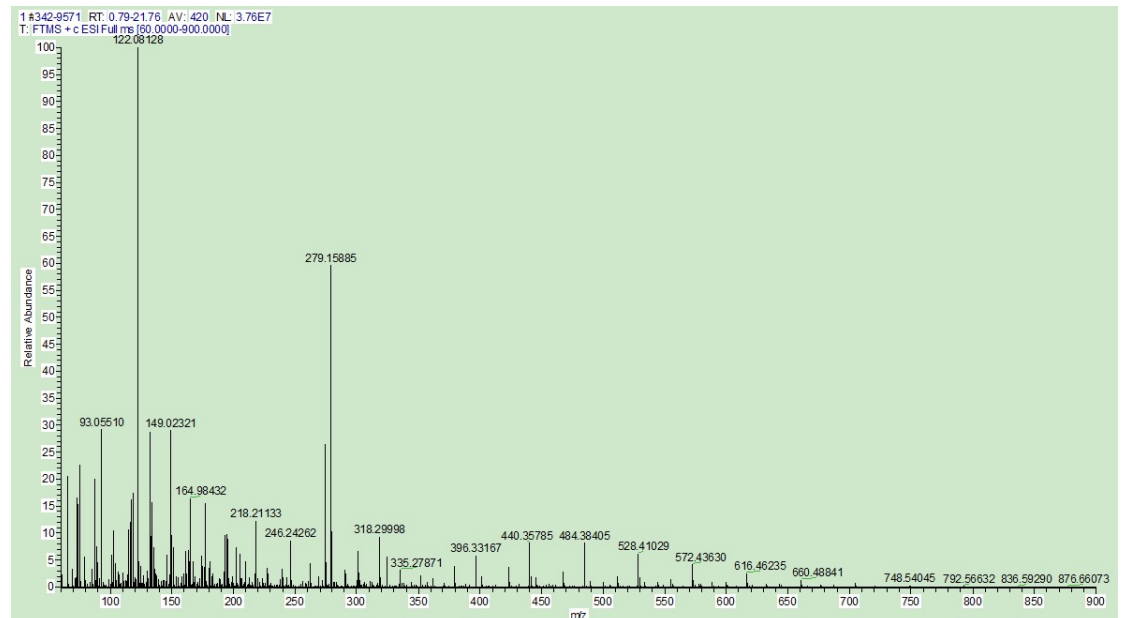

**Fig. 1** UPLC–MS results of tetracycline hydrochloride degradation products [FT-2: 0.5 g L<sup>-1</sup>; PMS: 2 mM; tetracycline hydrochloride: 40mg/L].
